# Supplementary material for: A stable and easily regenerable solid amine adsorbent derived from a polyethylenimine-impregnated dialdehyde-cellulose/graphene-oxide composite
Source: Royal Society of Chemistry journal article supplement (doi:10.1039/d2nj00530a), 2022-01-01
Supplement: d2nj00530a10.pdf [file d2nj00530a10.pdf]

Electronic Supplementary Material (ESI) for New Journal of Chemistry.

This journal is © The Royal Society of Chemistry and the Centre National de la Recherche Scientifique
