# Supplementary material for: A stable and easily regenerable solid amine adsorbent derived from a polyethylenimine-impregnated dialdehyde-cellulose/graphene-oxide composite
Source: Royal Society of Chemistry journal article supplement (doi:10.1039/d2nj00530a), 2022-01-01
Supplement: d2nj00530a11.pdf [file d2nj00530a11.pdf]

1  
2  
3  
4  
5  
6  
7  
8  
9  
10  
11  
12  
13  
14  
15  
16  
17  
18  
19  
20  
21  
22  
23  
24  
25  
26  
27  
28  
29  
30  
31  
32  
33  
34

New Journal of Chemistry

Electronic Supplementary Information

**A stable and easily regenerable solid amine adsorbent derived from  
polyethylenimine-impregnated dialdehyde-cellulose/graphene-oxide  
composite**

Xianyu Qiu <sup>a</sup>, Xiaoqiong Wang <sup>a</sup>, Shuixia Chen <sup>\*ab</sup>

<sup>a</sup> *PCFM Lab, School of Chemistry, Sun Yat-Sen University, Guangzhou 510275, PR  
China*

<sup>b</sup> *Materials Science Institute, Sun Yat-Sen University, Guangzhou 510275, PR China*

35

### 36 Titration method to quantify the aldehyde content

37 The aldehyde content on the surface of DAC was estimated by the titration method  
38 as reported in the literature.<sup>1</sup> After freeze drying, 0.1 g of pieced DAC aerogel was  
39 weighed and placed into 0.25 M Hydroxylamine hydrochloride ( $\text{NH}_2\text{OH}\cdot\text{HCl}$ ) solution  
40 (25 mL), which was adjusted to pH 4.5 with HCl. All the mixture was placed in dark,  
41 shaken in the thermostatic water bath at ambient temperature for 48 h. The conversion  
42 of aldehyde to oxime was determined by the consumption of 0.1 M NaOH solution,  
43 each sample was quantified twice.

44

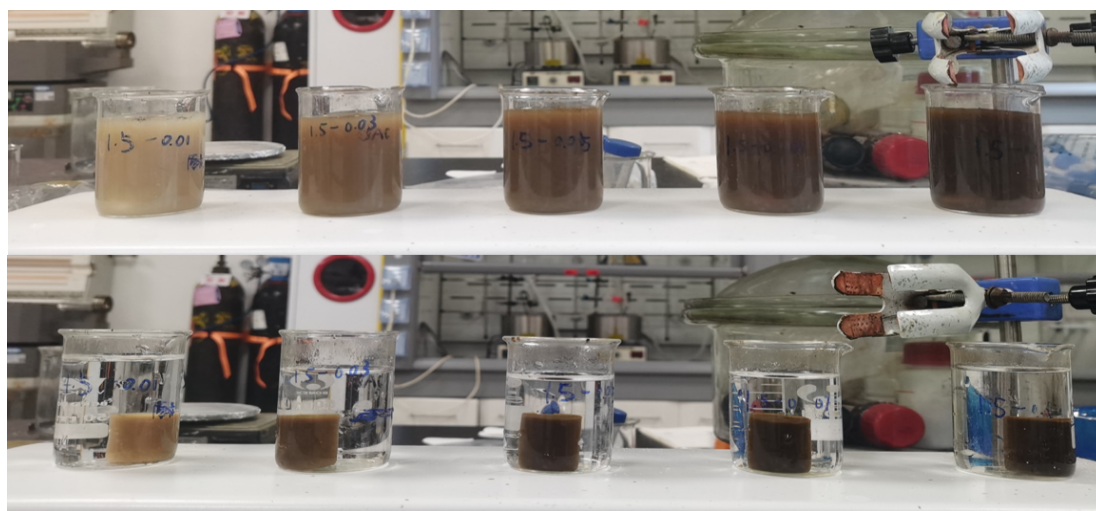

45

46 **Fig. S1** Photo images of the self-assembly of DAC-GO with different concentration  
47 of GO (0.01 wt%, 0.03 wt%, 0.05 wt%, 0.07 wt%, 0.1 wt%) before and after  
48 periodate oxidation.

49

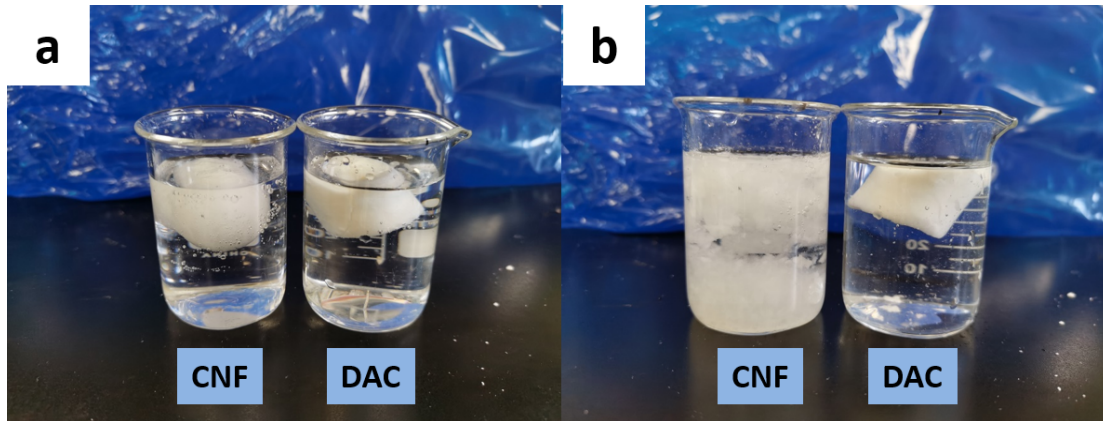

50

51 **Fig. S2** Photo images of the CNF aerogel and DAC aerogel when hydrated again after  
52 freeze-drying: (a) hydrated samples at the beginning; (b) hydrated samples after shaking.

53

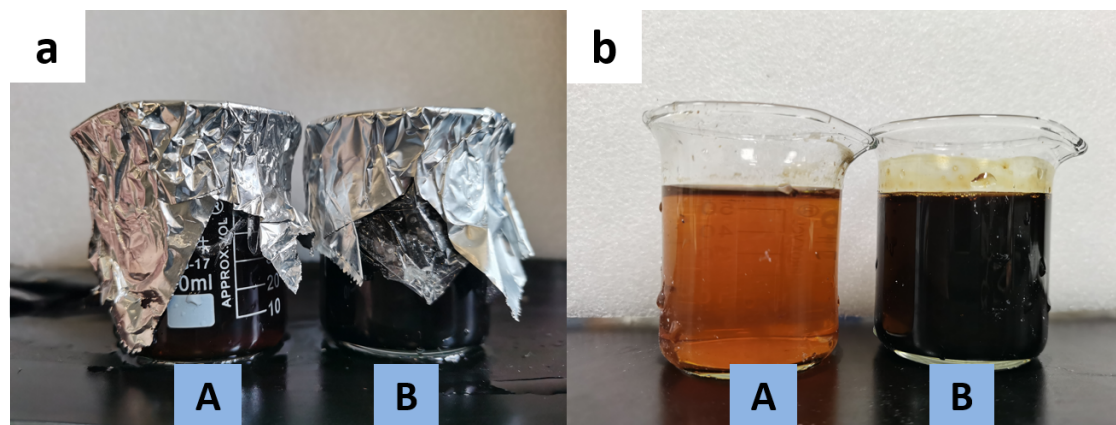

54

55 **Fig. S3** Photo images of water solution with different concentration of GO before (a)  
56 and after (b) periodate oxidation: A: 0.05 wt% GO; B: 0.6 wt% GO.

57

58 **Mechanical property of DAC-0.05GO gel in humid conditions**

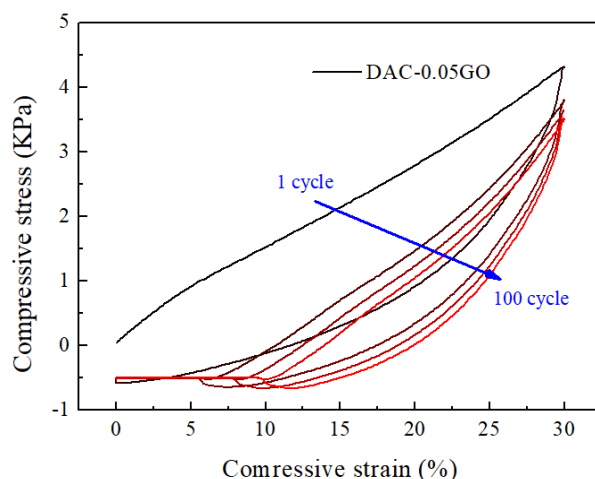

59

60 **Fig. S4** Stress–strain curves during 100 cycles of compression-releasing at a constant  
 61 strain of 30%, showing the stress–strain curves of selected cycles (0th, 30th, 60th,  
 62 100th).

63

64

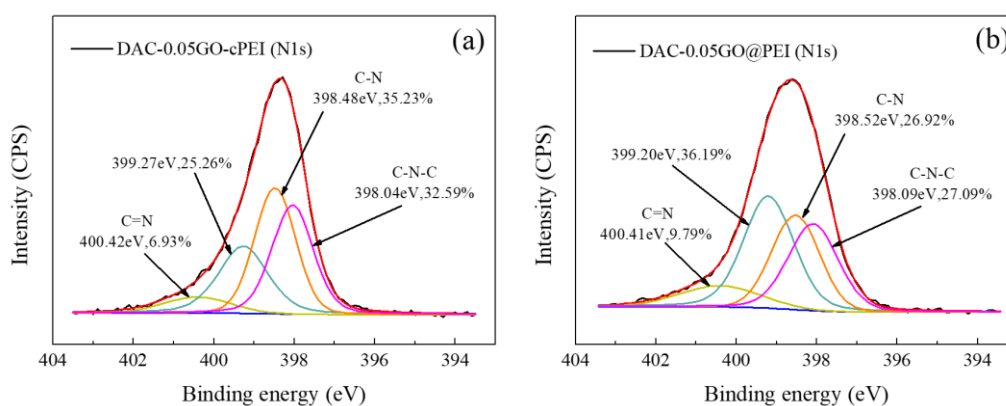

65

66 **Fig. S5** XPS spectra of DAC-0.05GO after amination: (a) N1s spectrum of DAC-  
 67 0.05GO-cPEI; (b) N1s spectrum of DAC-0.05GO@PEI.

68

69 **Structural characterization**

70 Nitrogen adsorption–desorption isotherms, characterized at 77 K in the range of

71 relative pressure from  $10^{-6}$  to 1 by using adsorption instrument (JW-BK200C, JEGB  
 72 SCI&TECH., China), were used to determine the surface area and pore size distribution  
 73 of the samples.  $V_{\text{Total}}$  was calculated based on the nitrogen amount adsorbed at  $P/P_0 =$   
 74 0.95. Before measuring, non-aminated aerogels were degassed under a vacuum at 120 °C  
 75 for 6 h, aminated aerogels were degassed under a vacuum at 100 °C for 6 h. Specific  
 76 surface area was calculated by using the Brunauer-Emmett-Teller (BET) method from  
 77 the isotherm in the relative pressure range between 0.05 and 0.15. Pore parameters were  
 78 calculated by using density functional theory (DFT) method.

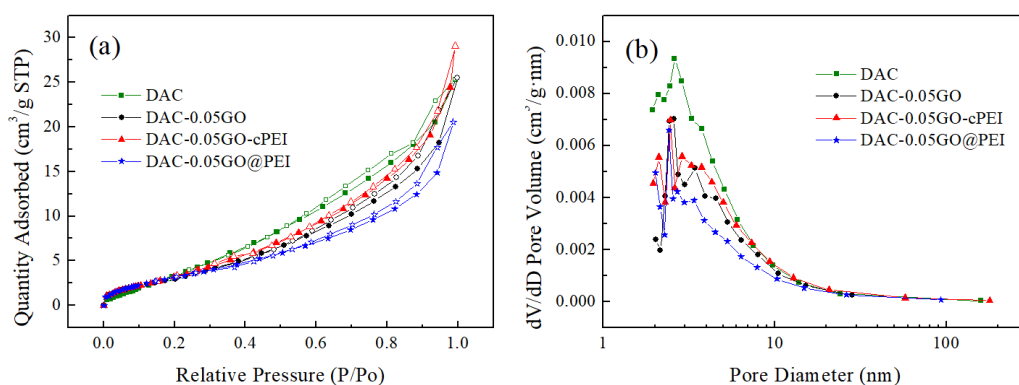

79

80 **Fig. S6.** The N<sub>2</sub> adsorption–desorption isotherms (a) and pore size distributions (b) of  
 81 DAC, DAC-0.05GO, DAC-0.05GO-cPEI and DAC-0.05GO@PEI.

82 **Table S1** Summary of pore parameters of the gels.

| Samples         | $S_{\text{BET}}$ (m <sup>2</sup> /g) | $V_{\text{Total}}$ (cm <sup>3</sup> /g) | $D_{\text{Pore}}$ (nm) |
|-----------------|--------------------------------------|-----------------------------------------|------------------------|
| DAC             | 11.487                               | 0.039                                   | 10.625                 |
| DAC-0.05GO      | 10.271                               | 0.039                                   | 13.894                 |
| DAC-0.05GO-cPEI | 11.291                               | 0.045                                   | 15.641                 |
| DAC-0.05GO@PEI  | 10.783                               | 0.032                                   | 10.687                 |

83 As it was shown in Fig. S6, all N<sub>2</sub> adsorption–desorption isotherms belonged to  
84 Type IV with hysteresis loops (Fig. S6a) and all the samples had similar pore size  
85 distributions (Fig. S6b), which showed that these materials possessed mesoporous  
86 structure. As shown in Table S1, the specific surface area and total pore volume of all  
87 the gels were close, indicating that composite or amination showed little influence on  
88 pore characteristic. Therefore, the slight-increased CO<sub>2</sub> adsorption amount on  
89 composite gel might be attributed to slight-increased space inside the support, while the  
90 increased CO<sub>2</sub> adsorption amount on DAC-0.05GO-cPEI might be attributed to  
91 increased effective amino sites.

92

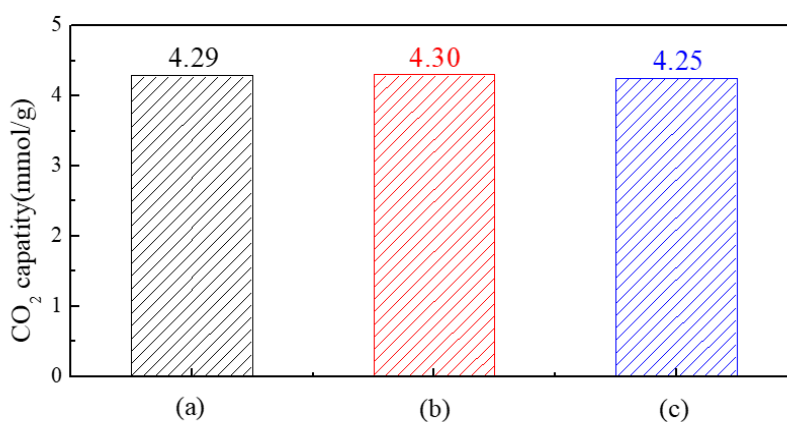

93

94 **Fig. S7** CO<sub>2</sub> amount adsorbed on DAC-0.05GO-cPEI at 25 °C before conducting  
95 desorption test at 70 °C (a), 80 °C (b) and 90 °C (c).

96

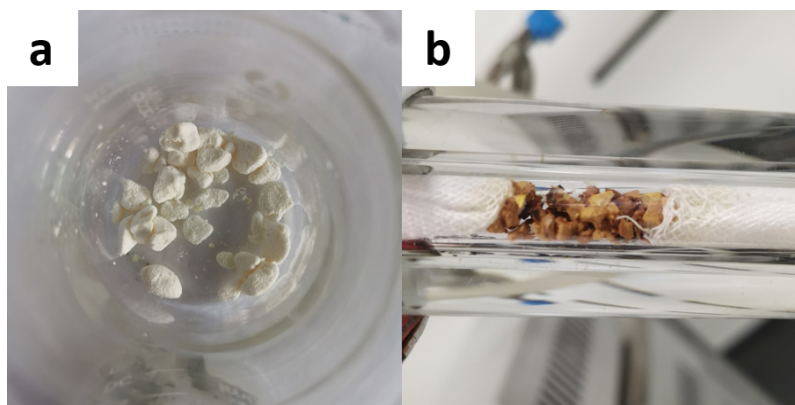

97

98 **Fig. S8** Photo images of DAC-cPEI: (a) fresh sample; (b) regenerated sample after  
99 CO<sub>2</sub> desorption at 70 °C.

100

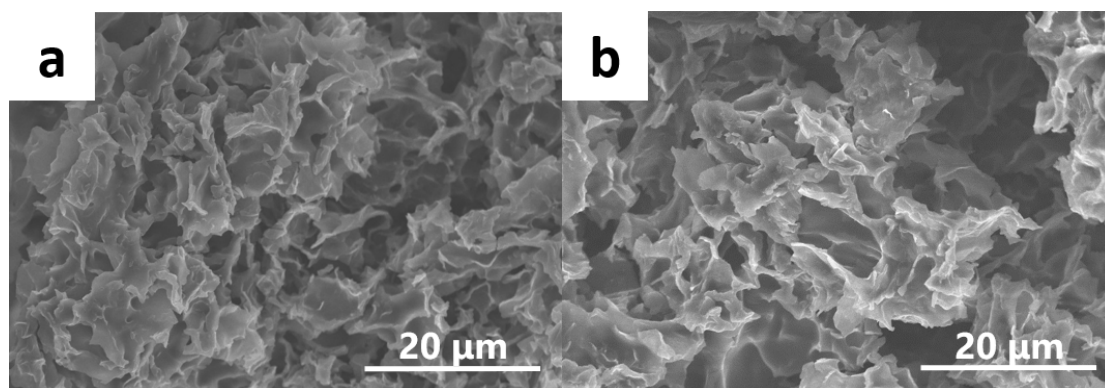

101

102 **Fig. S9** SEM images of DAC-0.05GO-cPEI: (a) fresh sample; (b) regenerated sample.

103

104 **References:**

105 1 U. Kim, M. Wada and S. Kuga, 2004, **56**, 7–10.

106
