# Supplementary figures and images for: A stable and easily regenerable solid amine adsorbent derived from a polyethylenimine-impregnated dialdehyde-cellulose/graphene-oxide composite
Source: Royal Society of Chemistry journal article supplement (doi:10.1039/d2nj00530a), 2022-01-01

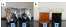

Supplement: d2nj00530a4.pdf [file d2nj00530a4.pdf]

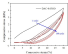

Supplement: d2nj00530a5.pdf [file d2nj00530a5.pdf]

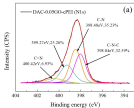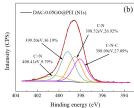

Supplement: d2nj00530a6.pdf [file d2nj00530a6.pdf]

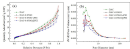

Supplement: d2nj00530a7.pdf [file d2nj00530a7.pdf]

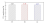

Supplement: d2nj00530a8.pdf [file d2nj00530a8.pdf]
